# Supplementary material for: CLEC5A and TLR2 are critical in SARS-CoV-2-induced NET formation and lung inflammation
Source: PubMed Central journal article supplement (PMC9277873; doi:10.1186/s12929-022-00832-z), 2022-07-11

# Supplementary figure 1

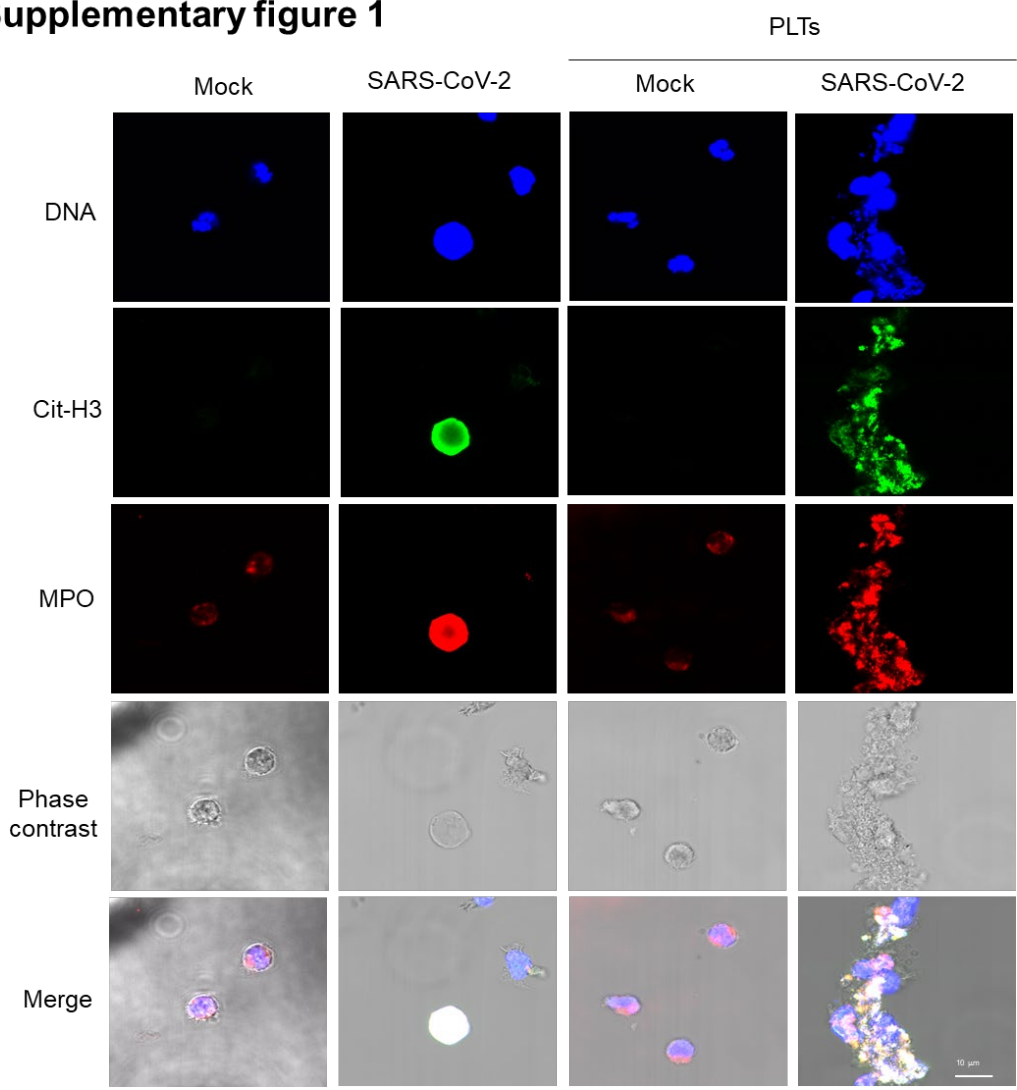

## Supplementary figure 2

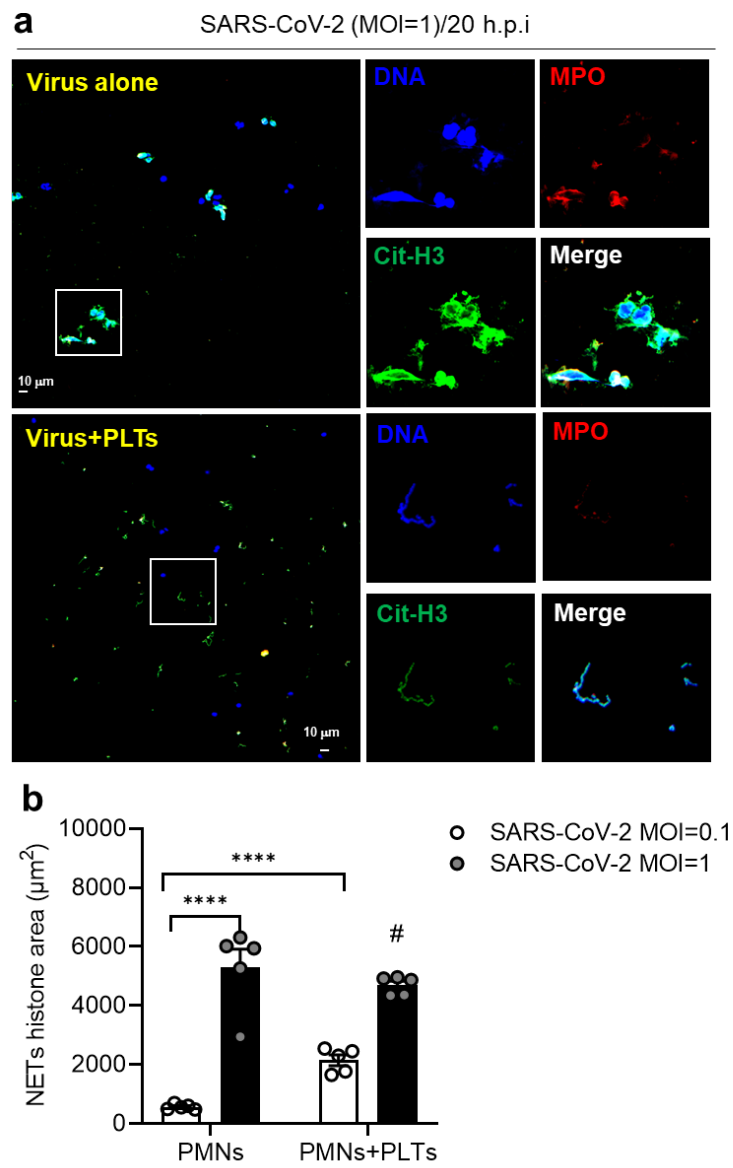

### Supplementary figure 3

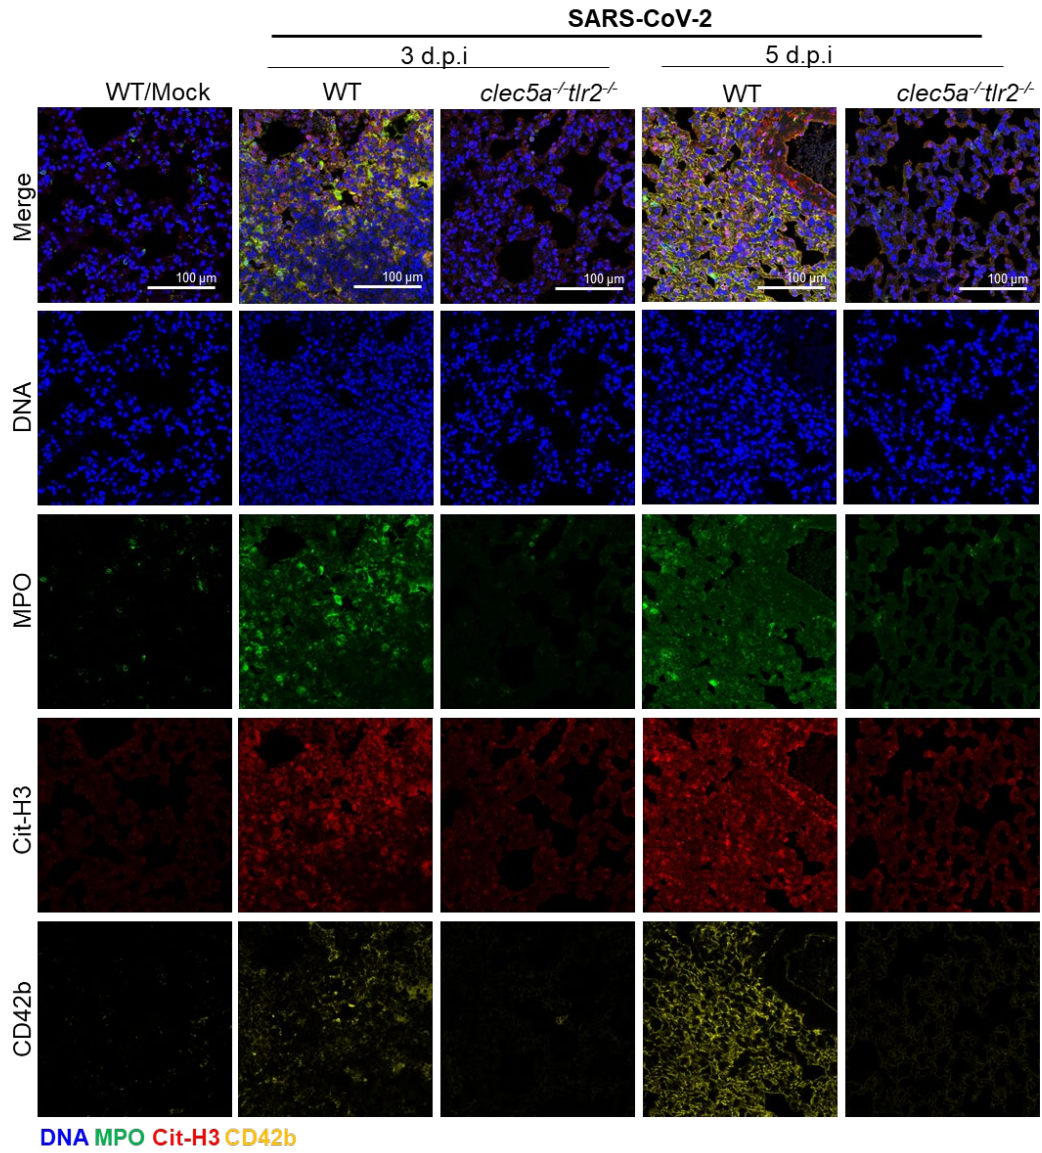

Supplement: 12929_2022_832_MOESM1_ESM.pdf [file 12929_2022_832_MOESM1_ESM.pdf]
