# Supplementary material for: CLEC5A and TLR2 are critical in SARS-CoV-2-induced NET formation and lung inflammation
Source: PubMed Central journal article supplement (PMC9277873; doi:10.1186/s12929-022-00832-z), 2022-07-11
Supplement: 12929_2022_832_MOESM2_ESM.pdf [file 12929_2022_832_MOESM2_ESM.pdf]

**Supplementary table 1. Sequences of qPCR primers**

| Target                               | Forward sequence (5' to 3') | Reverse sequence (5' to 3') |
|--------------------------------------|-----------------------------|-----------------------------|
| mouse <i>tnf-<math>\alpha</math></i> | GCCTCTTCTCATTCCCTGCTTG      | CTGATGAGAGGGAGGCCATT        |
| mouse <i>il-6</i>                    | GAGGATAACCACTCCCAACAGACC    | AAGTGCATCATCGTTGTTTCATAC    |
| mouse <i>ip-10</i>                   | CCAAGTGCTGCCGTCATTTTC       | GGCTCGCAGGGATGATTTCAA       |
| mouse <i>cxcl1</i>                   | CAATGAGCTGCGCTGTCAGTG       | CTTGGGGACACCTTTTAGCATC      |
| mouse <i>cxcl2</i>                   | CCAAGGGTTGACTTCAAGAAC       | AGCGAGGCACATCAGGTACG        |
| mouse <i>cxcl5</i>                   | CCGCTGGCATTCTGTTGCTGT       | CAGGGATCACCTCCAAATTAGCG     |
| mouse <i>ccl2</i>                    | TTAAAAACCTGGATCGGAACCAA     | GCATTAGCTTCAGATTTACGGGT     |
| mouse <i>ccl5</i>                    | GCTGCTTTGCCTACCTCTCC        | TCGATGACAAACACGACTGC        |
| mouse <i>ifn-<math>\gamma</math></i> | CATGGCTGTTTCTGGCTGTTACTG    | GTTGCTGATGGCCTGATTGTCTTT    |
| mouse <i>gapdh</i>                   | GGAGAAACCTGCCAAGTATG        | TGGGAGTTGCTGTTGAAG          |
